# Supplementary figures and images for: Effects of unfolding treatment assisted glycation on the IgE/IgG binding capacity and antioxidant activity of ovomucoid
Source: Royal Society of Chemistry journal article supplement (doi:10.1039/d3fo04035f), 2023-12-04

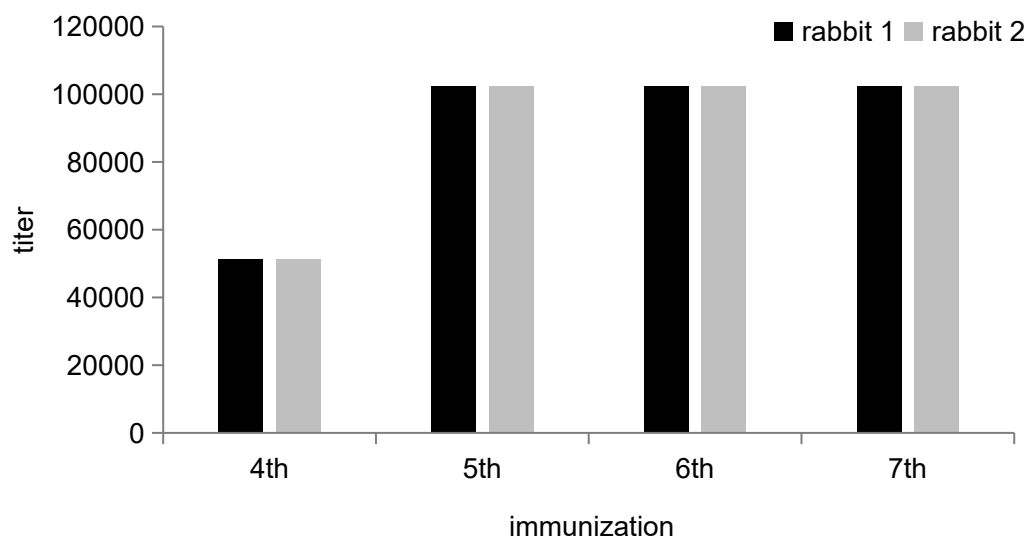

**Figure S1**

Supplement: d3fo04035f1.pdf [file d3fo04035f1.pdf]
